# Supplementary material
Source: Springer Nature journal article supplement (https://www.springermedizin.de/resource/supplementary/12876_2001_14_MOESM3_ESM.pdf/9436814)

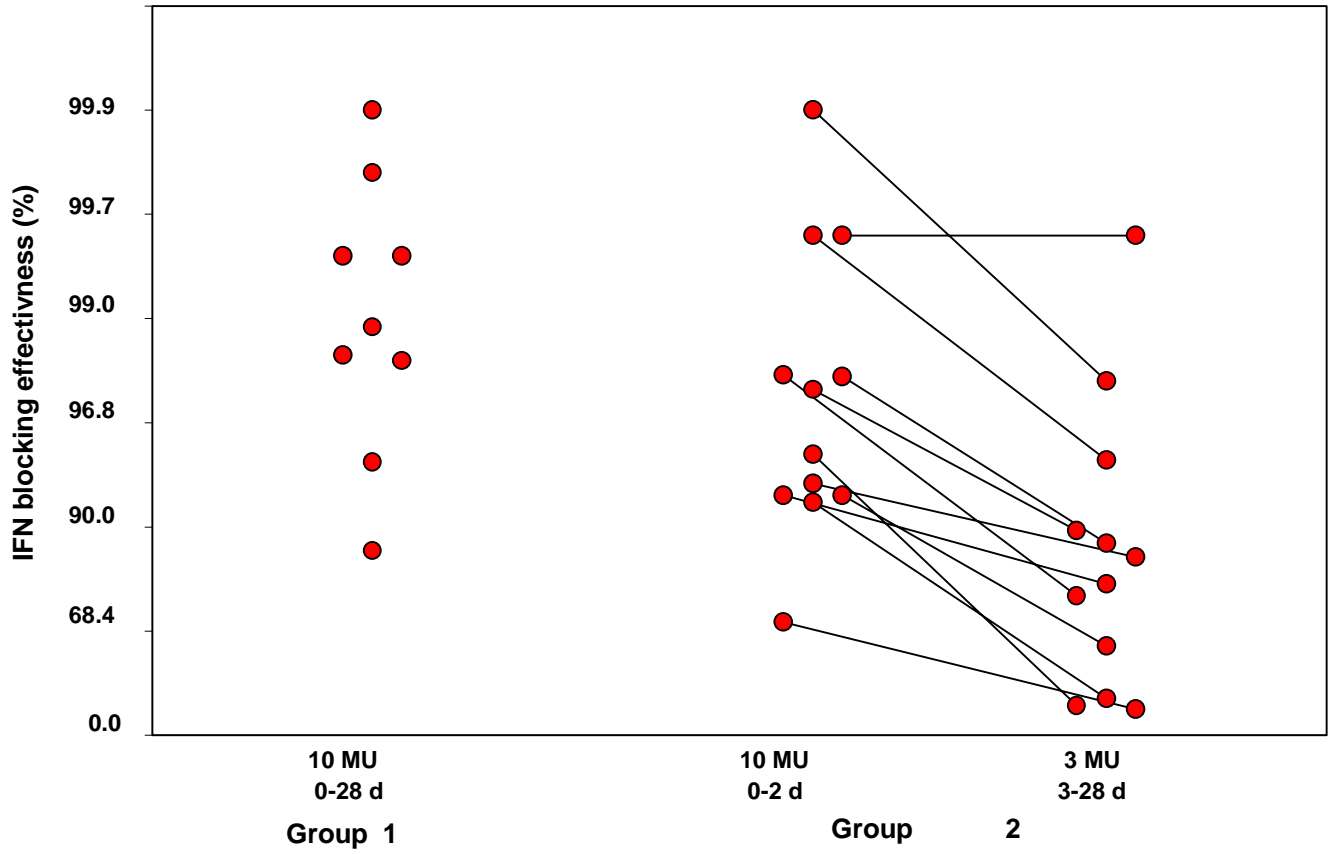

**Figure 3b:**

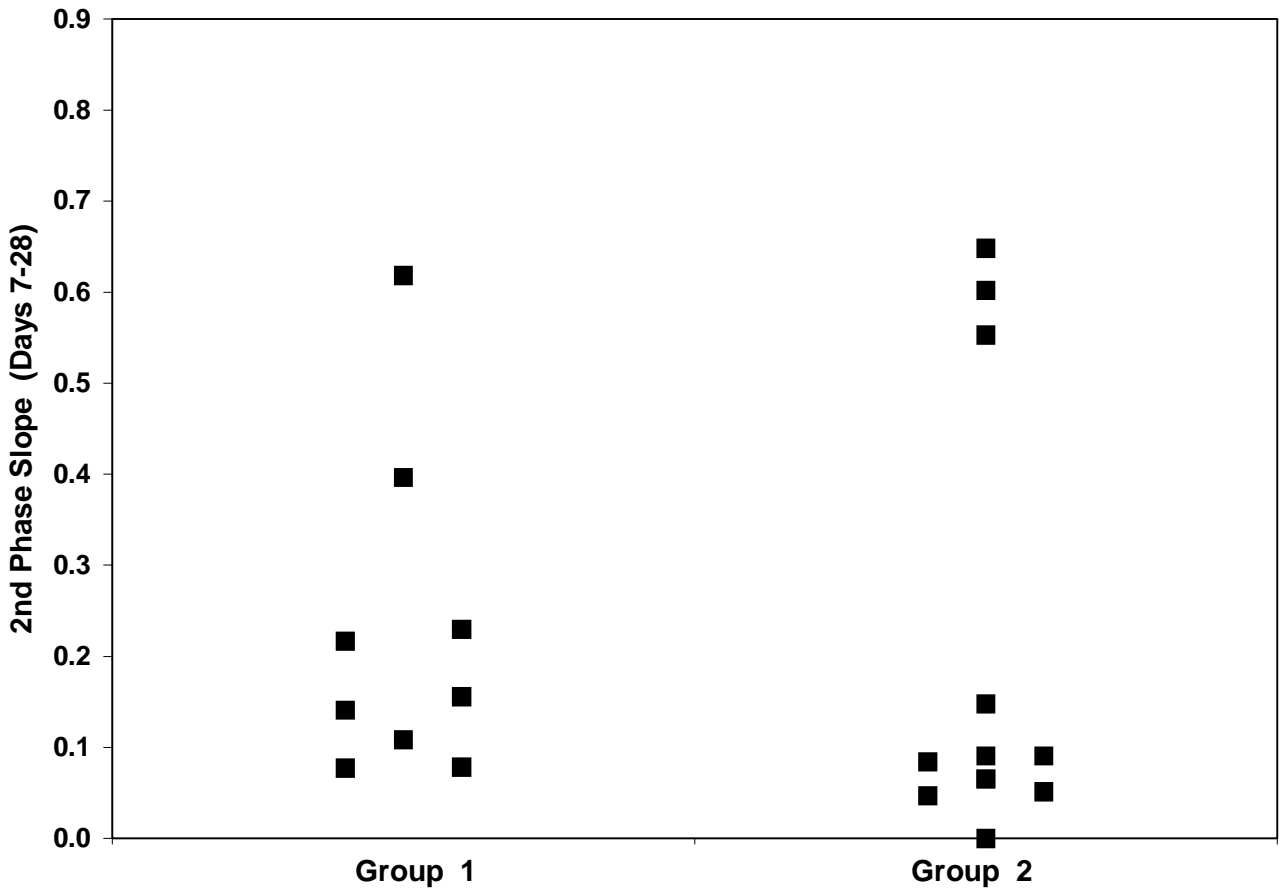

Supplement: MOESM3 [file 9436814]
